# Supplementary material for: Blotting Paper-Derived Activated Porous Carbon/Reduced Graphene Oxide Composite Electrodes for Supercapacitor Applications
Source: PubMed Central journal article supplement (PMC6943556; doi:10.3390/molecules24244625), 2019-12-17
Supplement: molecules-24-04625-s001.pdf [file molecules-24-04625-s001.pdf]

## Supporting Information

# Blotting Paper-derived Activated Porous Carbon/Reduced Graphene Oxide Composite Electrodes for Supercapacitor Applications

Qinting Jiang <sup>1,†</sup>, Dandan Liu <sup>2,†</sup>, Bo Liu <sup>1</sup>, Tong Zhou <sup>1,\*</sup> and Jin Zhou <sup>2,\*</sup>

<sup>1</sup> Lab of Functional Molecules and Materials, School of Physics and Optoelectronic Engineering, Shandong University of Technology, Zibo 255049, China; Qintingjiang@163.com (Q.J.); liub@sdut.edu.cn (D.L.); zhoutong@sdut.edu.cn (B.L.)

<sup>2</sup> School of Chemistry and Chemical Engineering, Shandong University of Technology, Zibo 255049, P. R. China; 1834428148@163.com

\* Correspondence: zhoutong@sdut.edu.cn (T.Z.); zhoujin@sdut.edu.cn (J.Z.); Tel.: +0533-278-7863 (T.Z.)

† These authors contributed equally to the work

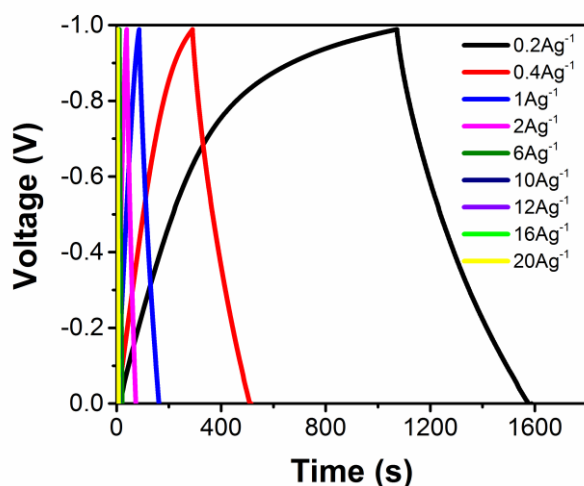

Figure S1. GCD curves of GBCP-1 from 0.2 A g<sup>-1</sup> to 20 A g<sup>-1</sup>.

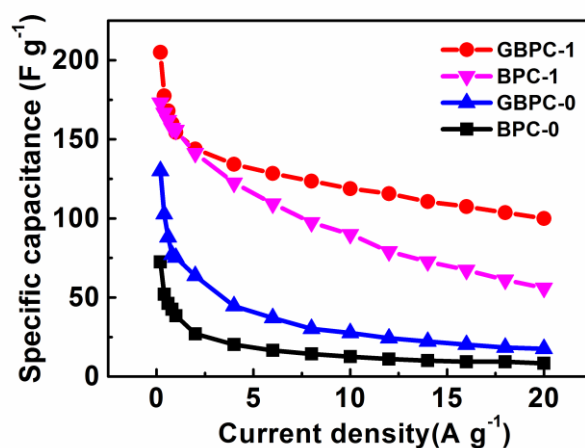

Figure S2. specific capacitance at current densities from 0.2 A g<sup>-1</sup> to 20 A g<sup>-1</sup>.

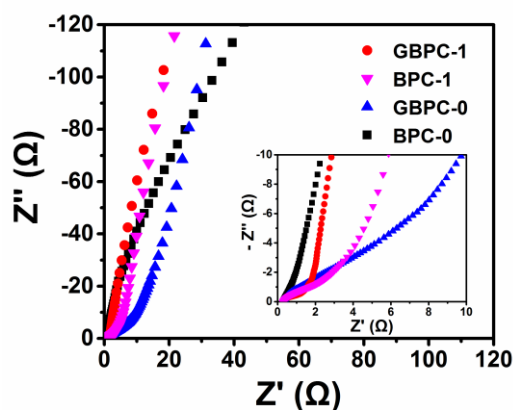

**Figure S3.** Electrochemical impedance spectra of GBPCs-1, BPC-1, GBPC-0, and GBPCs-0.

**Table S1** Comparison of the capacitive performance of other biomass-based thermal annealed electrodes.

| Material                | Surface Area                          | Electrochemical Performance                                                                | Ref.      |
|-------------------------|---------------------------------------|--------------------------------------------------------------------------------------------|-----------|
| Cotton/rGO              | 392.6 m <sup>2</sup> g <sup>-1</sup>  | 120F g <sup>-1</sup> at 3 A g <sup>-1</sup><br>in PVA/ KOH                                 | [51]      |
| Bacterial cellulose/rGO | 137 m <sup>2</sup> g <sup>-1</sup>    | 216 F g <sup>-1</sup> at 0.1 A g <sup>-1</sup><br>in 6.0 M KOH                             | [52]      |
| Silk/GO                 | 1927 m <sup>2</sup> g <sup>-1</sup>   | 52.8 F g <sup>-1</sup> at 0.18 A g <sup>-1</sup><br>in 6.0 M KOH                           | [53]      |
| Lignin/rGO              | 1744 m <sup>2</sup> g <sup>-1</sup>   | 165 F g <sup>-1</sup> at 20 A g <sup>-1</sup><br>in 1.0 M H <sub>2</sub> SO <sub>4</sub>   | [54]      |
| Basewood                | 1438 m <sup>2</sup> g <sup>-1</sup>   | 135 F g <sup>-1</sup> at 0.2 A g <sup>-1</sup><br>in 4.0 M KOH                             | [55]      |
| Gelatin                 | 50.8 m <sup>2</sup> g <sup>-1</sup>   | 168 F g <sup>-1</sup> at 5 A g <sup>-1</sup><br>in 2.0 M Na <sub>2</sub> SO <sub>4</sub>   | [56]      |
| Peanut shell            | 2070 m <sup>2</sup> g <sup>-1</sup>   | 186 F g <sup>-1</sup> at 0.5 A g <sup>-1</sup><br>in 1.0 M H <sub>2</sub> SO <sub>4</sub>  | [57]      |
| Chitin                  | 1000 m <sup>2</sup> g <sup>-1</sup>   | 138 F g <sup>-1</sup> at 0.92 A g <sup>-1</sup><br>in 1.0 M H <sub>2</sub> SO <sub>4</sub> | [58]      |
| Sisal leaves            | 1137 m <sup>2</sup> g <sup>-1</sup>   | 204 F g <sup>-1</sup> at 1 A g <sup>-1</sup><br>in 1.0 M LiOH                              | [59]      |
| Viscose cloth           | 1205 m <sup>2</sup> g <sup>-1</sup>   | 121 F g <sup>-1</sup> at 0.02 A g <sup>-1</sup><br>in 1.0 M H <sub>2</sub> SO <sub>4</sub> | [60]      |
| Blotting paper/rGO      | 1066.9 m <sup>2</sup> g <sup>-1</sup> | 204 F g <sup>-1</sup> at 0.2A g <sup>-1</sup><br>in 6.0 M KOH                              | This work |
